# Supplementary material for: Chemical Authentication of Botanical Ingredients: A Review of Commercial Herbal Products
Source: PubMed Central journal article supplement (PMC8082499; doi:10.3389/fphar.2021.666850), 2021-04-15
Supplement: table1.pdf [file table1.pdf]

## *Supplementary Material*

**Supplementary Table 1 | The authenticity of commercial herbal products at continental level**

| Continent  | Countries | Products | Products/country | Authentic |                  | Adulterated |                  |
|------------|-----------|----------|------------------|-----------|------------------|-------------|------------------|
|            | no.       | no.      | $\bar{x}$        | no.       | % <sup>(*)</sup> | no.         | % <sup>(*)</sup> |
| Asia       | 9         | 877      | 97.4             | 654       | 75               | 223         | 25               |
| N. America | 3         | 767      | 255.6            | 563       | 73               | 204         | 27               |
| Europe     | 20        | 573      | 28.6             | 413       | 72               | 160         | 28               |
| S. America | 2         | 86       | 43               | 37        | 43               | 49          | 57               |
| Australia  | 2         | 25       | 12.5             | 14        | 56               | 11          | 44               |
| Africa     | 1         | 5        | 5                | 2         | 40               | 3           | 60               |

\*The percentage values were rounded to the nearest whole number
